# Supplementary material for: Saccharification of Agricultural Wastes and Clarification of Orange Juice by Penicillium rolfsii CCMB 714 Pectinase
Source: MDPI journal article supplement (doi:10.3390/fermentation9100917), 2023-10-19
Supplement: s1 [file s1]

Archive with 1 entries (1 files):
- fermentation-2327225-supplementary.pdf
