# Supplementary material for: Saccharification of Agricultural Wastes and Clarification of Orange Juice by Penicillium rolfsii CCMB 714 Pectinase
Source: MDPI journal article supplement (doi:10.3390/fermentation9100917), 2023-10-19
Supplement: s1 [file s1 › fermentation-2327225-supplementary.pdf]

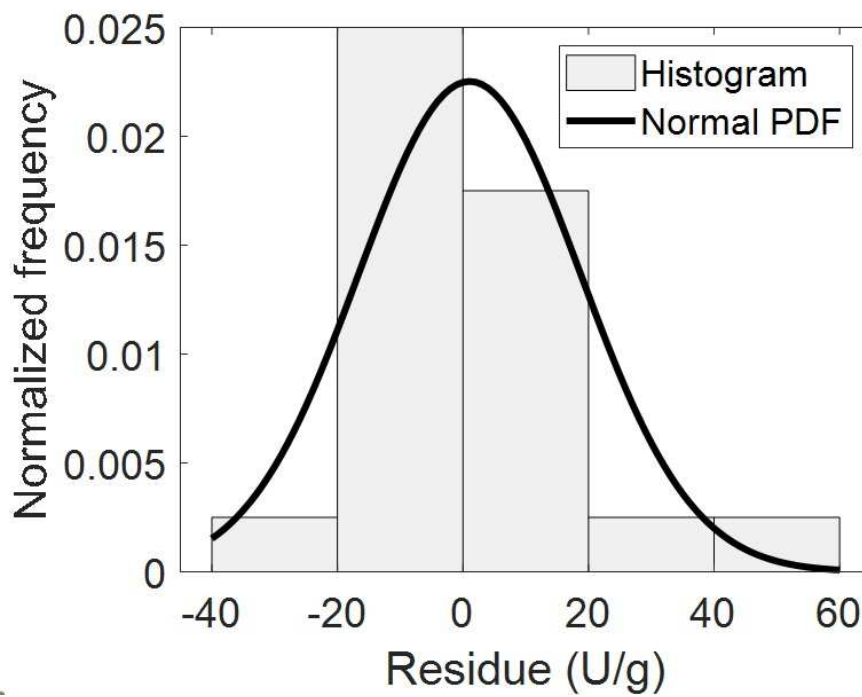

Figure S1. Histogram of residuals and approximation of normal probability density function of pectinase activity produced by *P. rolf sii* CCMB-714.

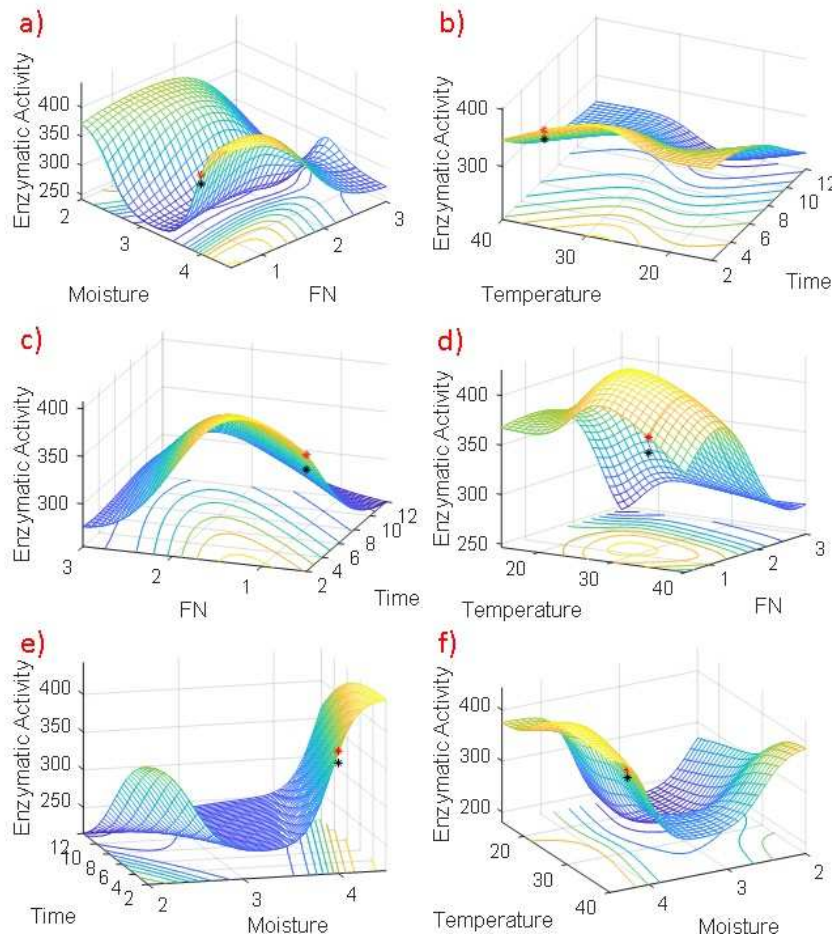

Figure S2. Tridimensional perspectives of the ANN experiment model. Each perspective was obtained by varying two inputs and fixing the other two to the value of experiment 21. (a)  $T = 35/\text{FN} = 0.5$ ; (b)  $t = 32/\text{FN} = 0.5$ ; (c)  $t = 2/T = 35$ ; (d)  $V = 4/\text{FN} = 0.5$ ; (e)  $V = 4/T = 35$ ; and (f)  $V = 4/t = 2$ . Asterisks provide a comparison between experiment 21 enzyme activity (\*) and ANN model estimation. Moisture (M), time (t), temperature (T), nitrogen (FN) and enzymatic activity (EA, U/g).

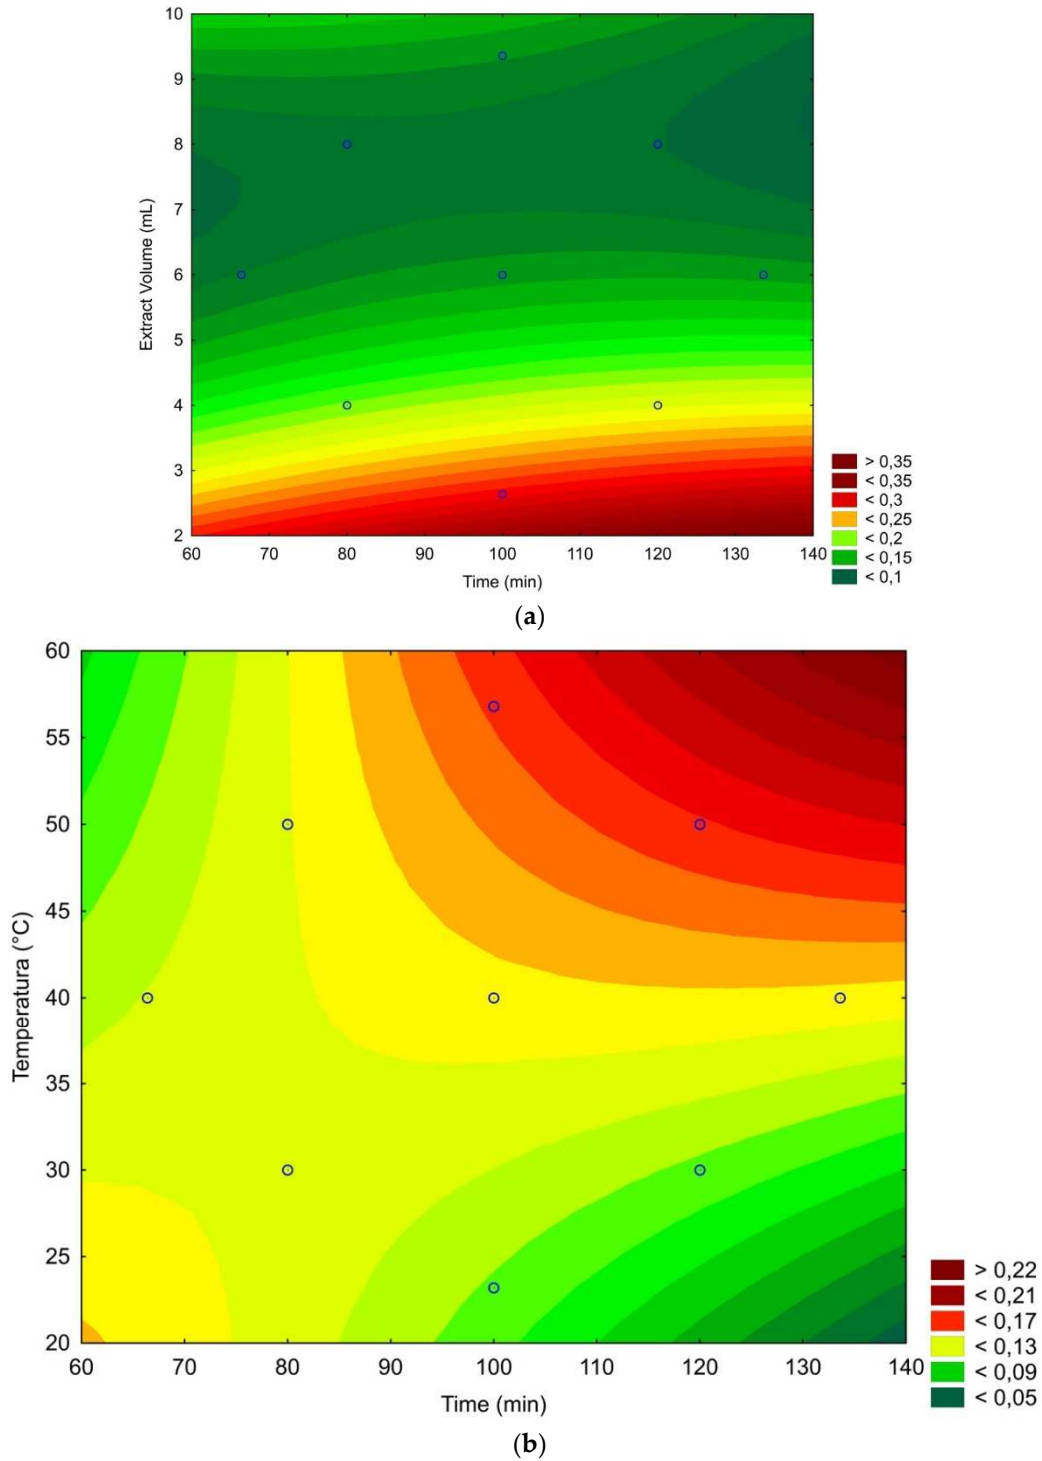

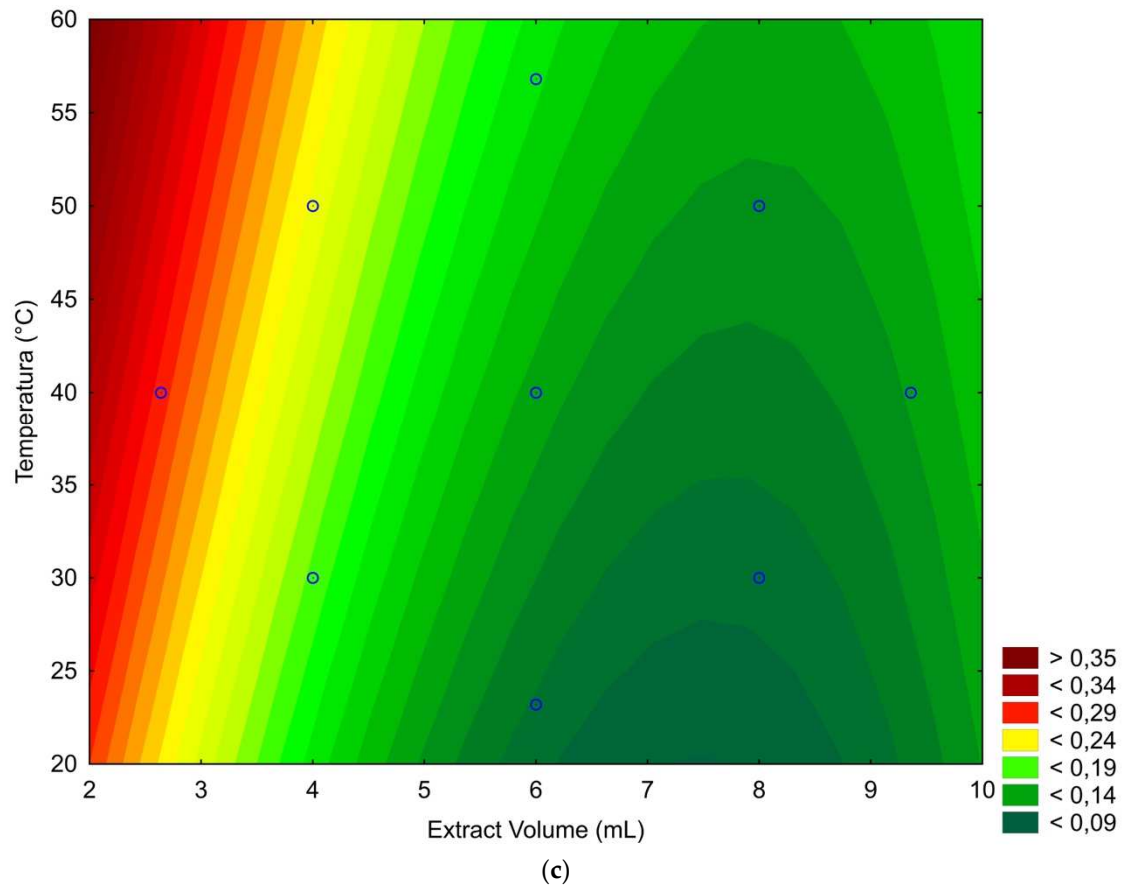

Figure S3. Contour curves for the relationships between the coded factors: (a) volume of enzymatic extract (V, mL) versus time (t, min), (b) temperature (T, °C) versus t (time, min) and (c) T (°C) versus V (mL) for the absorbance response (abs) from orange juice clarification by *P. rolfssii* CCMB-714 pectinases.

Table S1: Mixing matrix using nitrogen sources: cocoa seed peel (CSP), yeast extract (YE), ammonium phosphate (AP) as a supplement to the substrate (5 g) of jackfruit seed bran at a final concentration of 1% (w/w) for production of pectinases (PEC, U/g) by *P. rolf sii* CCMB – 714.

| Experiment | Variables  |           |           | Responses  |
|------------|------------|-----------|-----------|------------|
|            | <i>CSP</i> | <i>YE</i> | <i>AP</i> | <i>PEC</i> |
|            | (% w/w)    | (% w/w)   | (% w/w)   | (U/g)      |
| 1          | 1.00       | 0.00      | 0.00      | 243.81     |
| 2          | 0.00       | 1.00      | 0.00      | 252.88     |
| 3          | 0.00       | 0.00      | 1.00      | 266.67     |
| 4          | 0.50       | 0.50      | 0.00      | 306.58     |
| 5          | 0.50       | 0.00      | 0.50      | 293.51     |
| 6          | 0.00       | 0.50      | 0.50      | 299.32     |
| 7          | 0.333      | 0.333     | 0.333     | 309.84     |
| 8          | 0.333      | 0.333     | 0.333     | 326.53     |
| 9          | 0.333      | 0.333     | 0.333     | 347.21     |

Table S2: Results obtained for ANOVA showing the mathematical models evaluated and the quadratic used to generate the surface using nitrogen sources: cocoa seed peel (CSP), yeast extract (YE), ammonium phosphate (AP) as a supplement to the substrate (5 g) of jackfruit seed bran at a final concentration of 1% (w/ w) for production of pectinases (PEC, U/g) by *P. rolfsii* CCMB – 714.

| Factor         | ANOVA                          |                                |                                |                               |                               |                               |          |          |                       |                                      |
|----------------|--------------------------------|--------------------------------|--------------------------------|-------------------------------|-------------------------------|-------------------------------|----------|----------|-----------------------|--------------------------------------|
|                | <i>SS</i><br>( <i>effect</i> ) | <i>df</i><br>( <i>effect</i> ) | <i>MS</i><br>( <i>effect</i> ) | <i>SS</i><br>( <i>error</i> ) | <i>df</i><br>( <i>error</i> ) | <i>MS</i><br>( <i>error</i> ) | <i>F</i> | <i>p</i> | <i>R</i> <sup>2</sup> | <i>R</i> <sup>2</sup> <sub>adj</sub> |
| Linear         | 150.97                         | 2                              | 75.485                         | 9133.045                      | 6                             | 1522.174                      | 0.049    | 0.952    | 0.016                 | 0                                    |
| Quadratic      | 8258.29                        | 3                              | 2752.766                       | 874.746                       | 3                             | 291.582                       | 9.441    | 0.049    | 0.905                 | 0.749                                |
| Special cubic  | 173.81                         | 1                              | 173.814                        | 700.932                       | 2                             | 350.466                       | 0.496    | 0.554    | 0.924                 | 0.698                                |
| Total Adjusted | 150.96                         | 2                              | 75.485                         | 9133.045                      | 6                             | 1522.174                      | 0.0496   | 0.952    | 0.016                 | 0                                    |
| Model          | 8583.08                        | 6                              | 1430.514                       |                               |                               |                               | 4.081    | 0.210    |                       |                                      |
| Total Error    | 700.93                         | 2                              | 350.466                        |                               |                               |                               |          |          |                       |                                      |
| Lack of Fit    | 0.021                          | 0                              | 0.000                          |                               |                               |                               |          |          |                       |                                      |
| Pure Error     | 700.912                        | 2                              | 350.456                        |                               |                               |                               |          |          |                       |                                      |
| Total Adjusted | 9284.01                        | 8                              | 1160.502                       |                               |                               |                               |          |          |                       |                                      |

Table S3: Pearson correlation coefficients between each input and output. Second line (\*) computed without 21th essay. The correlation was between moisture (M), time (t), temperature (T) and nitrogen source (NS) and the enzymatic activity (EA, U/g).

|                          | <b>M x EA</b> | <b>t x EA</b> | <b>T x EA</b> | <b>NSx EA</b> |
|--------------------------|---------------|---------------|---------------|---------------|
| Correlation coefficient  | 0.152         | -0.219        | 0.428         | 0.313         |
| Correlation coefficient* | 0.008         | -0.060        | 0.334         | 0.583         |

Table S4: Analysis of the effect of ions and reagents (1 and 5 mM) on the pectinase activity produced by *P. rolfii* CCMB – 714, values expressed as relative activity (%).

| Additives                           | Relative Activity    |              |
|-------------------------------------|----------------------|--------------|
|                                     | (U/U <sub>o</sub> %) |              |
|                                     | 1 mM                 | 5 mM         |
| Control (no additives)              | 100.0 ± 0.008        |              |
| <b>Na<sub>2</sub>CO<sub>3</sub></b> | 104.5 ± 0.04         | 102.7 ± 0.04 |
| NiSO <sub>4</sub>                   | 99.9 ± 0.03          | 95.6 ± 0.03  |
| ZnSO <sub>4</sub>                   | 107.0 ± 0.0          | 90.0 ± 0.03  |
| <b>MgCl<sub>2</sub></b>             | 96.4 ± 0.01          | 97.6 ± 0.05  |
| <b>CaCl<sub>2</sub></b>             | 91.2 ± 0.02          | 91.6 ± 0.01  |
| <b>LiSO<sub>4</sub></b>             | 108.3 ± 0.01         | 101.0 ± 0.02 |
| MnSO <sub>4</sub>                   | 99.4 ± 0.03          | 101.1 ± 0.03 |
| <b>CuSO<sub>4</sub></b>             | 117.1 ± 0.02         | 56.8 ± 0.01  |
| SDS                                 | 100.8 ± 0.06         | 3.5 ± 0.02   |
| EDTA                                | 112.7 ± 0.01         | 205.4 ± 0.04 |
| β-Mercaptoetanol                    | 83.5 ± 0.01          | 79.4 ± 0.01  |

Table S5: Matrix of the Central Composite Rotational Design (CCDR 2<sup>2</sup>) for the coded and uncoded independent variables: Temperature (°C) and time (h) and the reducing sugar response (μmol /mL) from the saccharification of passion fruit peel by *P. rolfii* CCMB – 714 pectinases.

| Variables  |                     |             | Responses                    |
|------------|---------------------|-------------|------------------------------|
| Experiment | Temperature<br>(°C) | Time<br>(h) | Reducing sugar<br>(μmol /mL) |
| 1          | -1 (35)             | -1 (5)      | 79.24                        |
| 2          | 1 (55)              | -1 (5)      | 92.18                        |
| 3          | -1 (35)             | 1 (19)      | 94.41                        |
| 4          | 1 (55)              | 1 (19)      | 90.62                        |
| 5          | -1.41 (30.9)        | 0 (12)      | 72.32                        |
| 6          | 1.41 (59.1)         | 0 (12)      | 85.04                        |
| 7          | 0 (45)              | -1.41 (2)   | 86.42                        |
| 8          | 0 (45)              | 1.41 (22)   | 126.55                       |
| 9          | 0 (45)              | 0 (12)      | 77.90                        |
| 10         | 0 (45)              | 0 (12)      | 93.74                        |
| 11         | 0 (45)              | 0 (12)      | 85.93                        |

Table S6: Table of coefficients model chosen according to their statistical significance by the t test and p value. The test evaluated the influence of temperature and incubation time on the saccharification of passion fruit peel by pectinase from *P. rolfsii* CCMB – 714.

|                        | <b>Regr.Coeff.</b> | <b>Std.Err.</b> | <b>t(5)</b> | <b>p</b>     |
|------------------------|--------------------|-----------------|-------------|--------------|
| <b>Mean</b>            | 85,871             | 5,122           | 16,764      | <<br>0,0001* |
| <b>(T)<sup>2</sup></b> | 3,396              | 3,142           | 1,081       | 0,3291       |
| <b>(T)</b>             | -4,500             | 3,749           | -1,200      | 0,2838       |
| <b>(t)<sup>2</sup></b> | 8,800              | 3,142           | 2,801       | 0,0379*      |

\* statistically significant with 90 % of confidence ( $p < 0.10$ )

Table S7: Table of coefficients model chosen according to their statistical significance by the t test and p value. The test evaluated the time, volume of enzymatic extract and temperature and the absorbance response (read at 600 nm) from the clarification of orange juice by *P. rolfsii* CCMB-714 pectinases.

|                        | <b>Regr.Coeff.</b> | <b>Std.Err.</b> | <b>t(7)</b> | <b>p</b>     |
|------------------------|--------------------|-----------------|-------------|--------------|
| <b>Mean</b>            | 0,136              | 0,013           | 10,557      | <<br>0.0001* |
| <b>(t)<sup>2</sup></b> | 0,005              | 0,006           | 0,808       | 0,4456       |
| <b>(t)</b>             | -0,003             | 0,007           | -0,391      | 0,7073       |
| <b>(V)<sup>2</sup></b> | -0,046             | 0,006           | -7,579      | 0,0001*      |
| <b>(V)</b>             | 0,025              | 0,007           | 3,827       | 0,0065*      |
| <b>(T)<sup>2</sup></b> | 0,016              | 0,006           | 2,629       | 0,0340*      |
| <b>(T)</b>             | -0,0003            | 0,007           | -0,046      | 0,9644       |
| <b>(t)·(V)</b>         | -0,008             | 0,008           | -0,980      | 0,3599       |
| <b>(t)·(T)</b>         | 0,015              | 0,008           | 1,865       | 0,1045*      |
| <b>(V)·(T)</b>         | -0,004             | 0,008           | -0,537      | 0,6077       |

\* statistically significant with 85 % of confidence ( $p < 0.15$ )
